# Supplementary material for: Efficient Prediction of Progesterone Receptor Interactome Using a Support Vector Machine Model
Source: Int J Mol Sci. 2015 Mar 3;16(3):4774–85. doi: 10.3390/ijms16034774 (PMC4394448; doi:10.3390/ijms16034774)
Supplement: Supplementary file 1 [file ijms-16-04774-s001.xls]

## Sheet: Table S1
Table S1.The training set including 69 PR-interacting protein and 68 non-interacting proteins.
ID	Positive/Negtive	Gene	Description
P78527	P	PRKDC	protein kinase, DNA-activated, catalytic polypeptide
Q12830	P	BPTF	bromodomain PHD finger transcription factor
O95071	P	UBR5	ubiquitin protein ligase E3 component n-recognin 5
Q9Y618	P	NCOR2	nuclear receptor co-repressor 2
O75376	P	NCOR1	nuclear receptor co-repressor 1
Q09472	P	EP300	E1A binding protein p300
O14497	P	ARID1A	AT rich interactive domain 1A (SWI-like)
P38398	P	BRCA1	breast cancer 1, early onset
Q13029	P	PRDM2	PR domain containing 2, with ZNF domain
Q15596	P	NCOA2	nuclear receptor coactivator 2
Q15788	P	NCOA1	nuclear receptor coactivator 1
Q9Y6Q9	P	NCOA3	nuclear receptor coactivator 3
Q9BX66	P	SORBS1	sorbin and SH3 domain containing 1
P28370	P	SMARCA1	SWI/SNF related, matrix associated, actin dependent regulator of chromatin, subfamily a, member 1
O15164	P	TRIM24	tripartite motif-containing 24
P09874	P	PARP1	poly (ADP-ribose) polymerase 1
Q8TDD1	P	DDX54	DEAD (Asp-Glu-Ala-Asp) box polypeptide 54
Q05086	P	UBE3A	ubiquitin protein ligase E3A
Q92831	P	KAT2B	K(lysine) acetyltransferase 2B
P21802	P	FGFR2	fibroblast growth factor receptor 2
Q13105	P	ZBTB17	zinc finger and BTB domain containing 17
P42229	P	STAT5A	signal transducer and activator of transcription 5A
P08047	P	SP1	Sp1 transcription factor
P40763	P	STAT3	signal transducer and activator of transcription 3 (acute-phase response factor)
P14859	P	POU2F1	POU class 2 homeobox 1
P07900	P	HSP90AA1	heat shock protein 90kDa alpha (cytosolic), class A member 1
P13010	P	XRCC5	X-ray repair complementing defective repair in Chinese hamster cells 5 (double-strand-break rejoining)
P0CG48	P	UBC	ubiquitin C
O75925	P	PIAS1	protein inhibitor of activated STAT, 1
Q9Y6X2	P	PIAS3	protein inhibitor of activated STAT, 3
O75928	P	PIAS2	protein inhibitor of activated STAT, 2
P12956	P	XRCC6	X-ray repair complementing defective repair in Chinese hamster cells 6
P03372	P	ESR1	estrogen receptor 1
Q53T94	P	TAF1B	TATA box binding protein (TBP)-associated factor, RNA polymerase I, B, 63kDa
P30305	P	CDC25B	cell division cycle 25 homolog B (S. pombe)
Q04206	P	RELA	v-rel reticuloendotheliosis viral oncogene homolog A (avian)
P12931	P	SRC	v-src sarcoma (Schmidt-Ruppin A-2) viral oncogene homolog (avian)
Q13573	P	SNW1	SNW domain containing 1
Q14498	P	RBM39	RNA binding motif protein 39
Q9UBZ4	P	APEX2	APEX nuclease (apurinic/apyrimidinic endonuclease) 2
Q96GM5	P	SMARCD1	SWI/SNF related, matrix associated, actin dependent regulator of chromatin, subfamily d, member 1
P53041	P	PPP5C	protein phosphatase 5, catalytic subunit
Q99615	P	DNAJC7	DnaJ (Hsp40) homolog, subfamily C, member 7
P09086	P	POU2F2	POU class 2 homeobox 2
P51843	P	NR0B1	nuclear receptor subfamily 0, group B, member 1
P78396	P	CCNA1	cyclin A1
Q02790	P	FKBP4	FK506 binding protein 4, 59kDa
Q13451	P	FKBP5	FK506 binding protein 5
Q86U06	P	RBM23	RNA binding motif protein 23
P55345	P	PRMT2	protein arginine methyltransferase 2
P20248	P	CCNA2	cyclin A2
P43364	P	MAGEA11	melanoma antigen family A, 11
Q969G3	P	SMARCE1	SWI/SNF related, matrix associated, actin dependent regulator of chromatin, subfamily e, member 1
Q13569	P	TDG	thymine-DNA glycosylase
P51398	P	DAP3	death associated protein 3
P68400	P	CSNK2A1	casein kinase 2, alpha 1 polypeptide
P28482	P	MAPK1	mitogen-activated protein kinase 1
P63096	P	GNAI1	guanine nucleotide binding protein (G protein), alpha inhibiting activity polypeptide 1
Q92905	P	COPS5	COP9 constitutive photomorphogenic homolog subunit 5 (Arabidopsis)
Q9UNE7	P	STUB1	STIP1 homology and U-box containing protein 1
P24941	P	CDK2	cyclin-dependent kinase 2
Q9H467	P	CUEDC2	CUE domain containing 2
P39687	P	ANP32A	acidic (leucine-rich) nuclear phosphoprotein 32 family, member A
Q13886	P	KLF9	Kruppel-like factor 9
O75934	P	BCAS2	breast carcinoma amplified sequence 2
P09429	P	HMGB1	high-mobility group box 1
P78317	P	RNF4	ring finger protein 4
Q8WYK2	P	JDP2	Jun dimerization protein 2
Q9NR55	P	BATF3	basic leucine zipper transcription factor, ATF-like 3
Q9NR16	N	CD163L1	CD163 molecule-like 1
Q641Q2	N	FAM21A	family with sequence similarity 21, member A
Q9C0C9	N	UBE2O	ubiquitin-conjugating enzyme E2O
O43345	N	ZNF208	zinc finger protein 208
A4D2P6	N	GRID2IP	glutamate receptor, ionotropic, delta 2 (Grid2) interacting protein
P08648	N	ITGA5	integrin, alpha 5 (fibronectin receptor, alpha polypeptide)
O95782	N	AP2A1	adaptor-related protein complex 2, alpha 1 subunit
Q9UL12	N	SARDH	sarcosine dehydrogenase
Q9H269	N	VPS16	vacuolar protein sorting 16 homolog (S. cerevisiae)
Q9P244	N	LRFN1	leucine rich repeat and fibronectin type III domain containing 1
Q96M96	N	FGD4	FYVE, RhoGEF and PH domain containing 4
Q9P246	N	STIM2	stromal interaction molecule 2
Q9H8Y5	N	ANKZF1	ankyrin repeat and zinc finger domain containing 1
P52888	N	THOP1	thimet oligopeptidase 1
Q8IVT2	N	C19orf21	chromosome 19 open reading frame 21
P19113	N	HDC	histidine decarboxylase
Q9H6W3	N	C14orf169	chromosome 14 open reading frame 169
A5D8V7	N	CCDC151	coiled-coil domain containing 151
Q7Z5Q1	N	CPEB2	cytoplasmic polyadenylation element binding protein 2
Q9Y228	N	TRAF3IP3	TRAF3 interacting protein 3
Q9NZW5	N	MPP6	membrane protein, palmitoylated 6 (MAGUK p55 subfamily member 6)
O15131	N	KPNA5	karyopherin alpha 5 (importin alpha 6)
Q8N884	N	C6orf150	chromosome 6 open reading frame 150
Q14119	N	VEZF1	vascular endothelial zinc finger 1
Q5H9S7	N	C2orf37	chromosome 2 open reading frame 37
Q9BYC2	N	OXCT2	3-oxoacid CoA transferase 2
Q12857	N	NFIA	nuclear factor I/A
P55058	N	PLTP	phospholipid transfer protein
O43790	N	KRT86	keratin 86
Q8N149	N	LILRA2	leukocyte immunoglobulin-like receptor, subfamily A (with TM domain), member 2
P23769	N	GATA2	GATA binding protein 2
B1AKI9	N	ISM1	isthmin 1 homolog (zebrafish)
O95674	N	CDS2	CDP-diacylglycerol synthase (phosphatidate cytidylyltransferase) 2
Q969Z4	N	RELT	RELT tumor necrosis factor receptor
Q0P6D2	N	C18orf51	chromosome 18 open reading frame 51
O43820	N	HYAL3	hyaluronoglucosaminidase 3
P08727	N	KRT19	keratin 19
Q9H488	N	POFUT1	protein O-fucosyltransferase 1
A6NHQ4	N	C17orf96	chromosome 17 open reading frame 96
Q9NPC2	N	KCNK9	potassium channel, subfamily K, member 9
Q9P2T1	N	GMPR2	guanosine monophosphate reductase 2
Q8N5D6	N	GBGT1	globoside alpha-1,3-N-acetylgalactosaminyltransferase 1
P40199	N	CEACAM6	carcinoembryonic antigen-related cell adhesion molecule 6 (non-specific cross reacting antigen)
Q5JXA9	N	SIRPB2	signal-regulatory protein beta 2
Q11201	N	ST3GAL1	ST3 beta-galactoside alpha-2,3-sialyltransferase 1
Q9NWV8	N	C19orf62	chromosome 19 open reading frame 62
P59551	N	TAS2R60	taste receptor, type 2, member 60
O95045	N	UPP2	uridine phosphorylase 2
O60404	N	OR10H3	olfactory receptor, family 10, subfamily H, member 3
Q8NGF8	N	OR4B1	olfactory receptor, family 4, subfamily B, member 1
P28907	N	CD38	CD38 molecule
P50053	N	KHK	ketohexokinase (fructokinase)
Q9NRY7	N	PLSCR2	phospholipid scramblase 2
Q9UJQ1	N	C20orf103	chromosome 20 open reading frame 103
P41238	N	APOBEC1	apolipoprotein B mRNA editing enzyme, catalytic polypeptide 1
P32971	N	TNFSF8	tumor necrosis factor (ligand) superfamily, member 8
P32970	N	CD70	CD70 molecule
P84074	N	HPCA	hippocalcin
Q9NPB0	N	C6orf64	chromosome 6 open reading frame 64
O43447	N	PPIH	peptidylprolyl isomerase H (cyclophilin H)
Q9NWW9	N	HRASLS2	HRAS-like suppressor 2
Q8N111	N	CEND1	cell cycle exit and neuronal differentiation 1
O43927	N	CXCL13	chemokine (C-X-C motif) ligand 13
Q9Y6H6	N	KCNE3	potassium voltage-gated channel, Isk-related family, member 3
O60829	N	PAGE4	P antigen family, member 4 (prostate associated)
Q9NSA3	N	CTNNBIP1	catenin, beta interacting protein 1
Q9UBA6	N	C6orf48	chromosome 6 open reading frame 48

## Sheet: Table S2
Table S2. New human proteins that potentially interact with PR predicted by the SVM model.
ID	Probability	Gene	Description
Q12873	0.964066	CHD3	chromodomain helicase DNA binding protein 3
Q14839	0.96406	CHD4	chromodomain helicase DNA binding protein 4
Q8TDI0	0.964053	CHD5	chromodomain helicase DNA binding protein 5
P29074	0.964023	PTPN4	protein tyrosine phosphatase, non-receptor type 4 (megakaryocyte)
Q5S007	0.964022	LRRK2	leucine-rich repeat kinase 2
P11388	0.964009	TOP2A	topoisomerase (DNA) II alpha 170kDa
Q02880	0.964009	TOP2B	topoisomerase (DNA) II beta 180kDa
P26045	0.963992	PTPN3	protein tyrosine phosphatase, non-receptor type 3
Q9UIG0	0.963949	BAZ1B	bromodomain adjacent to zinc finger domain, 1B
Q15678	0.963942	PTPN14	protein tyrosine phosphatase, non-receptor type 14
Q16825	0.963941	PTPN21	protein tyrosine phosphatase, non-receptor type 21
P26038	0.96394	MSN	moesin
P35241	0.96394	RDX	radixin
P15311	0.963939	EZR	ezrin
O94887	0.963938	FARP2	FERM, RhoGEF and pleckstrin domain protein 2
P14616	0.963938	INSRR	insulin receptor-related receptor
P35240	0.963938	NF2	neurofibromin 2 (merlin)
Q9Y4F1	0.963937	FARP1	FERM, RhoGEF (ARHGEF) and pleckstrin domain protein 1 (chondrocyte-derived)
P08069	0.963937	IGF1R	insulin-like growth factor 1 receptor
P06213	0.963937	INSR	insulin receptor
Q12923	0.963857	PTPN13	protein tyrosine phosphatase, non-receptor type 13 (APO-1/CD95 (Fas)-associated phosphatase)
Q5VST9	0.963855	OBSCN	obscurin, cytoskeletal calmodulin and titin-interacting RhoGEF
O60229	0.963852	KALRN	kalirin, RhoGEF kinase
Q9NRL2	0.963734	BAZ1A	bromodomain adjacent to zinc finger domain, 1A
O15344	0.963733	MID1	midline 1 (Opitz/BBB syndrome)
Q149N8	0.963731	SHPRH	SNF2 histone linker PHD RING helicase
Q8NEZ4	0.963728	MLL3	myeloid/lymphoid or mixed-lineage leukemia 3
Q9UIF9	0.963716	BAZ2A	bromodomain adjacent to zinc finger domain, 2A
O43491	0.963715	EPB41L2	erythrocyte membrane protein band 4.1-like 2
Q9HCS5	0.963714	EPB41L4A	erythrocyte membrane protein band 4.1 like 4A
P11171	0.963711	EPB41	erythrocyte membrane protein band 4.1 (elliptocytosis 1, RH-linked)
Q9HCM4	0.963711	EPB41L5	erythrocyte membrane protein band 4.1 like 5
Q9Y2J2	0.963709	EPB41L3	erythrocyte membrane protein band 4.1-like 3
Q7Z6J6	0.963709	FRMD5	FERM domain containing 5
Q9H329	0.963708	EPB41L4B	erythrocyte membrane protein band 4.1 like 4B
Q9H4G0	0.963706	EPB41L1	erythrocyte membrane protein band 4.1-like 1
A2A2Y4	0.963702	FRMD3	FERM domain containing 3
P29475	0.963678	NOS1	nitric oxide synthase 1 (neuronal)
Q8WY64	0.963519	MYLIP	myosin regulatory light chain interacting protein
Q6ZTA4	0.963512	TRIM67	tripartite motif-containing 67
O96028	0.963511	WHSC1	Wolf-Hirschhorn syndrome candidate 1
Q9C026	0.963508	TRIM9	tripartite motif-containing 9
Q9UJV3	0.963505	MID2	midline 2
Q9NQ86	0.963502	TRIM36	tripartite motif-containing 36
O00329	0.963501	PIK3CD	phosphoinositide-3-kinase, catalytic, delta polypeptide
P48736	0.963498	PIK3CG	phosphoinositide-3-kinase, catalytic, gamma polypeptide
P42338	0.963495	PIK3CB	phosphoinositide-3-kinase, catalytic, beta polypeptide
P42336	0.963493	PIK3CA	phosphoinositide-3-kinase, catalytic, alpha polypeptide
Q969P6	0.963485	TOP1MT	topoisomerase (DNA) I, mitochondrial
P11387	0.963481	TOP1	topoisomerase (DNA) I
O75962	0.963473	TRIO	triple functional domain (PTPRF interacting)
Q6PIF6	0.963472	MYO7B	myosin VIIB
P51531	0.963472	SMARCA2	SWI/SNF related, matrix associated, actin dependent regulator of chromatin, subfamily a, member 2
Q9UKW4	0.963472	VAV3	vav 3 guanine nucleotide exchange factor
P51532	0.963471	SMARCA4	SWI/SNF related, matrix associated, actin dependent regulator of chromatin, subfamily a, member 4
Q6DT37	0.96347	CDC42BPG	CDC42 binding protein kinase gamma (DMPK-like)
Q13402	0.96347	MYO7A	myosin VIIA
Q14289	0.963469	PTK2B	PTK2B protein tyrosine kinase 2 beta
P04626	0.963468	ERBB2	v-erb-b2 erythroblastic leukemia viral oncogene homolog 2, neuro/glioblastoma derived oncogene homolog (avian)
P00533	0.963467	EGFR	epidermal growth factor receptor (erythroblastic leukemia viral (v-erb-b) oncogene homolog, avian)
Q15303	0.963465	ERBB4	v-erb-a erythroblastic leukemia viral oncogene homolog 4 (avian)
Q6ZUT3	0.963465	FRMD7	FERM domain containing 7
P41743	0.963458	PRKCI	protein kinase C, iota
Q05513	0.963452	PRKCZ	protein kinase C, zeta
P35228	0.963422	NOS2	nitric oxide synthase 2, inducible
P29474	0.963418	NOS3	nitric oxide synthase 3 (endothelial cell)
Q96RP9	0.963285	GFM1	G elongation factor, mitochondrial 1
Q969S9	0.963283	GFM2	G elongation factor, mitochondrial 2
P13639	0.96328	EEF2	eukaryotic translation elongation factor 2
Q15029	0.963267	EFTUD2	elongation factor Tu GTP binding domain containing 2
P19474	0.963162	TRIM21	tripartite motif-containing 21
Q9C019	0.96316	TRIM15	tripartite motif-containing 15
O75382	0.96316	TRIM3	tripartite motif-containing 3
P14373	0.96315	TRIM27	tripartite motif-containing 27
Q96T88	0.963149	UHRF1	ubiquitin-like with PHD and ring finger domains 1
Q6Q0C0	0.963145	TRAF7	TNF receptor-associated factor 7
Q9BZ95	0.963141	WHSC1L1	Wolf-Hirschhorn syndrome candidate 1-like 1
Q96L73	0.963138	NSD1	nuclear receptor binding SET domain protein 1
Q9UPN9	0.963138	TRIM33	tripartite motif-containing 33
Q96PU4	0.963135	UHRF2	ubiquitin-like with PHD and ring finger domains 2
O14686	0.963128	MLL2	myeloid/lymphoid or mixed-lineage leukemia 2
O00443	0.963122	PIK3C2A	phosphoinositide-3-kinase, class 2, alpha polypeptide
O75747	0.963118	PIK3C2G	phosphoinositide-3-kinase, class 2, gamma polypeptide
O00750	0.963116	PIK3C2B	phosphoinositide-3-kinase, class 2, beta polypeptide
Q6P158	0.963105	DHX57	DEAH (Asp-Glu-Ala-Asp/His) box polypeptide 57
Q9UIF8	0.963103	BAZ2B	bromodomain adjacent to zinc finger domain, 2B
Q9H6S0	0.963102	YTHDC2	YTH domain containing 2
P54760	0.963091	EPHB4	EPH receptor B4
Q00653	0.963088	NFKB2	nuclear factor of kappa light polypeptide gene enhancer in B-cells 2 (p49/p100)
Q9Y2L6	0.963087	FRMD4B	FERM domain containing 4B
P42680	0.963087	TEC	tec protein tyrosine kinase
Q68DX3	0.963086	FRMPD2	FERM and PDZ domain containing 2
Q04912	0.963086	MST1R	macrophage stimulating 1 receptor (c-met-related tyrosine kinase)
P19838	0.963086	NFKB1	nuclear factor of kappa light polypeptide gene enhancer in B-cells 1
P21709	0.963085	EPHA1	EPH receptor A1
Q08881	0.963085	ITK	IL2-inducible T-cell kinase
P29317	0.963084	EPHA2	EPH receptor A2
P08581	0.963084	MET	met proto-oncogene (hepatocyte growth factor receptor)
Q13464	0.963084	ROCK1	Rho-associated, coiled-coil containing protein kinase 1
P52701	0.963083	MSH6	mutS homolog 6 (E. coli)
Q9NR48	0.963082	ASH1L	ash1 (absent, small, or homeotic)-like (Drosophila)
Q15375	0.963082	EPHA7	EPH receptor A7
Q9P2Q2	0.963082	FRMD4A	FERM domain containing 4A
P55201	0.963081	BRPF1	bromodomain and PHD finger containing, 1
Q12756	0.96308	KIF1A	kinesin family member 1A
Q06187	0.963079	BTK	Bruton agammaglobulinemia tyrosine kinase
P29323	0.963079	EPHB2	EPH receptor B2
P53355	0.963078	DAPK1	death-associated protein kinase 1
P23458	0.963077	JAK1	Janus kinase 1 (a protein tyrosine kinase)
P29597	0.963077	TYK2	tyrosine kinase 2
P29320	0.963076	EPHA3	EPH receptor A3
O60333	0.963076	KIF1B	kinesin family member 1B
O14578	0.963075	CIT	citron (rho-interacting, serine/threonine kinase 21)
P15498	0.963075	VAV1	vav 1 guanine nucleotide exchange factor
Q8TD26	0.963074	CHD6	chromodomain helicase DNA binding protein 6
P54762	0.963074	EPHB1	EPH receptor B1
Q05397	0.963072	PTK2	PTK2 protein tyrosine kinase 2
P52735	0.963071	VAV2	vav 2 guanine nucleotide exchange factor
Q5VT25	0.963069	CDC42BPA	CDC42 binding protein kinase alpha (DMPK-like)
Q9H9Y6	0.963069	POLR1B	polymerase (RNA) I polypeptide B, 128kDa
P24723	0.963069	PRKCH	protein kinase C, eta
Q9UF33	0.963068	EPHA6	EPH receptor A6
O60674	0.963068	JAK2	Janus kinase 2 (a protein tyrosine kinase)
Q9Y5S2	0.963064	CDC42BPB	CDC42 binding protein kinase beta (DMPK-like)
Q02156	0.963063	PRKCE	protein kinase C, epsilon
Q05655	0.963059	PRKCD	protein kinase C, delta
P05771	0.963058	PRKCB	protein kinase C, beta
P17252	0.963057	PRKCA	protein kinase C, alpha
P35626	0.963056	ADRBK2	adrenergic, beta, receptor kinase 2
P25098	0.963055	ADRBK1	adrenergic, beta, receptor kinase 1
P05129	0.963054	PRKCG	protein kinase C, gamma
Q04759	0.963054	PRKCQ	protein kinase C, theta
P29375	0.962887	JARID1A	jumonji, AT rich interactive domain 1A
Q9UGL1	0.962877	JARID1B	jumonji, AT rich interactive domain 1B
P41229	0.962875	JARID1C	jumonji, AT rich interactive domain 1C
Q9BY66	0.962875	JARID1D	jumonji, AT rich interactive domain 1D
Q7Z2Z2	0.962769	EFTUD1	elongation factor Tu GTP binding domain containing 1
Q9Y577	0.962576	TRIM17	tripartite motif-containing 17
O00635	0.962576	TRIM38	tripartite motif-containing 38
Q9C029	0.962576	TRIM7	tripartite motif-containing 7
Q9C030	0.96257	TRIM6	tripartite motif-containing 6
Q9UPQ4	0.962566	TRIM35	tripartite motif-containing 35
Q8WV44	0.962566	TRIM41	tripartite motif-containing 41
Q9H8W5	0.962565	TRIM45	tripartite motif-containing 45
Q9HCM9	0.962558	TRIM39	tripartite motif-containing 39
Q6ZMU5	0.962558	TRIM72	tripartite motif-containing 72
Q9UDY6	0.962553	TRIM10	tripartite motif-containing 10
Q15326	0.962552	ZMYND11	zinc finger, MYND domain containing 11
Q8NG06	0.962549	TRIM58	tripartite motif-containing 58
Q86XT4	0.962548	TRIM50	tripartite motif-containing 50
Q6AZZ1	0.962547	TRIM68	tripartite motif-containing 68
P42345	0.962545	FRAP1	FK506 binding protein 12-rapamycin associated protein 1
Q495X7	0.962545	TRIM60	tripartite motif-containing 60
Q86WT6	0.962545	TRIM69	tripartite motif-containing 69
Q9BVG3	0.962542	TRIM62	tripartite motif-containing 62
Q9C040	0.962541	TRIM2	tripartite motif-containing 2
Q6PJ69	0.962541	TRIM65	tripartite motif-containing 65
Q13535	0.96254	ATR	ataxia telangiectasia and Rad3 related
Q7Z4K8	0.96254	TRIM46	tripartite motif-containing 46
Q96F44	0.962539	TRIM11	tripartite motif-containing 11
Q13233	0.962527	MAP3K1	mitogen-activated protein kinase kinase kinase 1
Q13263	0.962523	TRIM28	tripartite motif-containing 28
I1YAP6	0.962516	TRIM77	tripartite motif-containing 77
A6NGJ6	0.962498	TRIM64	tripartite motif-containing 64
P62917	0.962483	RPL8	ribosomal protein L8
P22681	0.96248	CBL	Cas-Br-M (murine) ecotropic retroviral transforming sequence
Q9Y490	0.962449	TLN1	talin 1
Q86VQ6	0.962447	TXNRD3	thioredoxin reductase 3
Q9Y4G6	0.962444	TLN2	talin 2
P51813	0.962442	BMX	BMX non-receptor tyrosine kinase
P24928	0.962441	POLR2A	polymerase (RNA) II (DNA directed) polypeptide A, 220kDa
Q16881	0.96244	TXNRD1	thioredoxin reductase 1
Q9NZM3	0.962439	ITSN2	intersectin 2
P04629	0.962435	NTRK1	neurotrophic tyrosine kinase, receptor, type 1
Q15811	0.962434	ITSN1	intersectin 1 (SH3 domain protein)
Q14204	0.962433	DYNC1H1	dynein, cytoplasmic 1, heavy chain 1
P29322	0.962433	EPHA8	EPH receptor A8
Q03164	0.962431	MLL	myeloid/lymphoid or mixed-lineage leukemia (trithorax homolog, Drosophila)
P42224	0.962431	STAT1	signal transducer and activator of transcription 1, 91kDa
P54764	0.96243	EPHA4	EPH receptor A4
P54756	0.962429	EPHA5	EPH receptor A5
Q9HD67	0.962429	MYO10	myosin X
Q14765	0.962428	STAT4	signal transducer and activator of transcription 4
P21860	0.962427	ERBB3	v-erb-b2 erythroblastic leukemia viral oncogene homolog 3 (avian)
Q9NW08	0.962424	POLR3B	polymerase (RNA) III (DNA directed) polypeptide B
P49792	0.962424	RANBP2	RAN binding protein 2
P52630	0.962424	STAT2	signal transducer and activator of transcription 2, 113kDa
Q8IZQ1	0.962423	WDFY3	WD repeat and FYVE domain containing 3
Q38SD2	0.962422	LRRK1	leucine-rich repeat kinase 1
Q14191	0.962421	WRN	Werner syndrome
Q8IVF4	0.96242	DNAH10	dynein, axonemal, heavy chain 10
P54753	0.96242	EPHB3	EPH receptor B3
Q8NCM8	0.962419	DYNC2H1	dynein, cytoplasmic 2, heavy chain 1
Q96DT5	0.962418	DNAH11	dynein, axonemal, heavy chain 11
P42226	0.962418	STAT6	signal transducer and activator of transcription 6, interleukin-4 induced
Q9NYC9	0.962417	DNAH9	dynein, axonemal, heavy chain 9
Q9P225	0.962415	DNAH2	dynein, axonemal, heavy chain 2
P52333	0.962413	JAK3	Janus kinase 3 (a protein tyrosine kinase, leukocyte)
Q9P2D1	0.962412	CHD7	chromodomain helicase DNA binding protein 7
Q8TE73	0.962411	DNAH5	dynein, axonemal, heavy chain 5
Q05193	0.962411	DNM1	dynamin 1
Q16288	0.962411	NTRK3	neurotrophic tyrosine kinase, receptor, type 3
Q96JB1	0.96241	DNAH8	dynein, axonemal, heavy chain 8
Q9BZL6	0.96241	PRKD2	protein kinase D2
Q13972	0.96241	RASGRF1	Ras protein-specific guanine nucleotide-releasing factor 1
P08922	0.96241	ROS1	c-ros oncogene 1 , receptor tyrosine kinase
Q99570	0.962409	PIK3R4	phosphoinositide-3-kinase, regulatory subunit 4
Q15139	0.962406	PRKD1	protein kinase D1
O94806	0.962406	PRKD3	protein kinase D3
P31749	0.962405	AKT1	v-akt murine thymoma viral oncogene homolog 1
P30876	0.962405	POLR2B	polymerase (RNA) II (DNA directed) polypeptide B, 140kDa
O43707	0.962404	ACTN4	actinin, alpha 4
Q16620	0.962403	NTRK2	neurotrophic tyrosine kinase, receptor, type 2
O75116	0.9624	ROCK2	Rho-associated, coiled-coil containing protein kinase 2
Q8WXX0	0.962399	DNAH7	dynein, axonemal, heavy chain 7
Q9UQ16	0.962398	DNM3	dynamin 3
P31751	0.962396	AKT2	v-akt murine thymoma viral oncogene homolog 2
Q9Y243	0.962393	AKT3	v-akt murine thymoma viral oncogene homolog 3 (protein kinase B, gamma)
P50570	0.96239	DNM2	dynamin 2
Q07889	0.962384	SOS1	son of sevenless homolog 1 (Drosophila)
Q9NRM7	0.962382	LATS2	LATS, large tumor suppressor, homolog 2 (Drosophila)
Q07890	0.962376	SOS2	son of sevenless homolog 2 (Drosophila)
P16435	0.962277	POR	P450 (cytochrome) oxidoreductase
Q9UBK8	0.962259	MTRR	5-methyltetrahydrofolate-homocysteine methyltransferase reductase
Q92793	0.962246	CREBBP	CREB binding protein
Q9UHB4	0.962246	NDOR1	NADPH dependent diflavin oxidoreductase 1
P15880	0.961933	RPS2	ribosomal protein S2
Q12899	0.961559	TRIM26	tripartite motif-containing 26
Q8N9V2	0.961559	TRIML1	tripartite motif family-like 1
Q9BYJ4	0.961543	TRIM34	tripartite motif-containing 34
Q8IUD6	0.961539	RNF135	ring finger protein 135
P36406	0.961532	TRIM23	tripartite motif-containing 23
Q14258	0.96153	TRIM25	tripartite motif-containing 25
Q9H2S5	0.96152	RNF39	ring finger protein 39
Q8IYM9	0.961513	TRIM22	tripartite motif-containing 22
O00463	0.961508	TRAF5	TNF receptor-associated factor 5
Q9C037	0.961507	TRIM4	tripartite motif-containing 4
Q9C035	0.961503	TRIM5	tripartite motif-containing 5
Q2Q1W2	0.961501	TRIM71	tripartite motif-containing 71
Q96LD4	0.961492	TRIM47	tripartite motif-containing 47
Q496Y0	0.96149	LONRF3	LON peptidase N-terminal domain and ring finger 3
Q8NHY2	0.96149	RFWD2	ring finger and WD repeat domain 2
Q96BQ3	0.96149	TRIM43	tripartite motif-containing 43
Q6ZWI9	0.961489	RFPL4B	ret finger protein-like 4B
Q12933	0.961489	TRAF2	TNF receptor-associated factor 2
Q17RB8	0.961484	LONRF1	LON peptidase N-terminal domain and ring finger 1
Q92794	0.96148	MYST3	MYST histone acetyltransferase (monocytic leukemia) 3
Q9BSJ1	0.961472	SPRYD5	SPRY domain containing 5
Q9BUZ4	0.96147	TRAF4	TNF receptor-associated factor 4
Q9Y4K3	0.961448	TRAF6	TNF receptor-associated factor 6
Q8NEB9	0.961445	PIK3C3	phosphoinositide-3-kinase, class 3
Q92731	0.961393	ESR2	estrogen receptor 2 (ER beta)
Q9Y4A5	0.961391	TRRAP	transformation/transcription domain-associated protein
Q14562	0.961389	DHX8	DEAH (Asp-Glu-Ala-His) box polypeptide 8
Q9H254	0.961382	SPTBN4	spectrin, beta, non-erythrocytic 4
Q08211	0.961372	DHX9	DEAH (Asp-Glu-Ala-His) box polypeptide 9
O15020	0.961368	SPTBN2	spectrin, beta, non-erythrocytic 2
O43143	0.961367	DHX15	DEAH (Asp-Glu-Ala-His) box polypeptide 15
P42679	0.961367	MATK	megakaryocyte-associated tyrosine kinase
Q03518	0.961364	TAP1	transporter 1, ATP-binding cassette, sub-family B (MDR/TAP)
Q9UPN3	0.961359	MACF1	microtubule-actin crosslinking factor 1
O14830	0.961359	PPEF2	protein phosphatase, EF-hand calcium binding domain 2
Q7Z4S6	0.961349	KIF21A	kinesin family member 21A
O14829	0.961348	PPEF1	protein phosphatase, EF-hand calcium binding domain 1
P41240	0.961347	CSK	c-src tyrosine kinase
Q13813	0.961347	SPTAN1	spectrin, alpha, non-erythrocytic 1 (alpha-fodrin)
Q14315	0.961343	FLNC	filamin C, gamma (actin binding protein 280)
Q01082	0.961343	SPTBN1	spectrin, beta, non-erythrocytic 1
Q15751	0.96134	HERC1	hect (homologous to the E6-AP (UBE3A) carboxyl terminus) domain and RCC1 (CHC1)-like domain (RLD) 1
Q9H1H9	0.961339	KIF13A	kinesin family member 13A
Q9NXZ2	0.961338	DDX43	DEAD (Asp-Glu-Ala-Asp) box polypeptide 43
Q03001	0.961338	DST	dystonin
O75037	0.961337	KIF21B	kinesin family member 21B
Q9BVI0	0.961337	PHF20	PHD finger protein 20
Q96L91	0.961335	EP400	E1A binding protein p400
Q9ULU4	0.961332	ZMYND8	zinc finger, MYND-type containing 8
O14647	0.961331	CHD2	chromodomain helicase DNA binding protein 2
Q9NQT8	0.961331	KIF13B	kinesin family member 13B
P42684	0.96133	ABL2	v-abl Abelson murine leukemia viral oncogene homolog 2 (arg, Abelson-related gene)
P04049	0.96133	RAF1	v-raf-1 murine leukemia viral oncogene homolog 1
O43463	0.96133	SUV39H1	suppressor of variegation 3-9 homolog 1 (Drosophila)
P00519	0.961328	ABL1	c-abl oncogene 1, receptor tyrosine kinase
P68371	0.961328	TUBB2C	tubulin, beta 2C
P06241	0.961327	FYN	FYN oncogene related to SRC, FGR, YES
P35590	0.961326	TIE1	tyrosine kinase with immunoglobulin-like and EGF-like domains 1
P04350	0.961325	TUBB4	tubulin, beta 4
P10398	0.961324	ARAF	v-raf murine sarcoma 3611 viral oncogene homolog
Q13882	0.961324	PTK6	PTK6 protein tyrosine kinase 6
Q92499	0.961323	DDX1	DEAD (Asp-Glu-Ala-Asp) box polypeptide 1
Q96T23	0.961322	RSF1	remodeling and spacing factor 1
Q9UK53	0.96132	ING1	inhibitor of growth family, member 1
Q8WYB5	0.96132	MYST4	MYST histone acetyltransferase (monocytic leukemia) 4
O95696	0.961319	BRD1	bromodomain containing 1
O15068	0.961319	MCF2L	MCF.2 cell line derived transforming sequence-like
P07437	0.961319	TUBB	tubulin, beta
P30530	0.961318	AXL	AXL receptor tyrosine kinase
P07949	0.961317	RET	ret proto-oncogene
O14646	0.961315	CHD1	chromodomain helicase DNA binding protein 1
Q8WXR4	0.961315	MYO3B	myosin IIIB
P42681	0.961315	TXK	TXK tyrosine kinase
Q3L8U1	0.961314	CHD9	chromodomain helicase DNA binding protein 9
Q96NE9	0.961313	FRMD6	FERM domain containing 6
Q06418	0.961312	TYRO3	TYRO3 protein tyrosine kinase
Q9BVA1	0.961311	TUBB2B	tubulin, beta 2B
P06576	0.961309	ATP5B	ATP synthase, H+ transporting, mitochondrial F1 complex, beta polypeptide
Q86TM3	0.961309	DDX53	DEAD (Asp-Glu-Ala-Asp) box polypeptide 53
O15016	0.961309	TRIM66	tripartite motif-containing 66
Q13885	0.961309	TUBB2A	tubulin, beta 2A
Q13509	0.961309	TUBB3	tubulin, beta 3
P07947	0.961308	YES1	v-yes-1 Yamaguchi sarcoma viral oncogene homolog 1
Q9UM73	0.961307	ALK	anaplastic lymphoma receptor tyrosine kinase
P53675	0.961307	CLTCL1	clathrin, heavy chain-like 1
O95267	0.961305	RASGRP1	RAS guanyl releasing protein 1 (calcium and DAG-regulated)
P54132	0.961304	BLM	Bloom syndrome
Q9HCK8	0.961304	CHD8	chromodomain helicase DNA binding protein 8
Q02763	0.961303	TEK	TEK tyrosine kinase, endothelial
Q9H4B7	0.961303	TUBB1	tubulin, beta 1
Q9BUF5	0.961303	TUBB6	tubulin, beta 6
Q9H3Y6	0.961302	SRMS	src-related kinase lacking C-terminal regulatory tyrosine and N-terminal myristylation sites
Q8IV61	0.961298	RASGRP3	RAS guanyl releasing protein 3 (calcium and DAG-regulated)
Q00610	0.961294	CLTC	clathrin, heavy chain (Hc)
Q9ULD4	0.961293	BRPF3	bromodomain and PHD finger containing, 3
P42685	0.961291	FRK	fyn-related kinase
Q6P5Z2	0.961291	PKN3	protein kinase N3
P62508	0.96129	ESRRG	estrogen-related receptor gamma
O14827	0.96129	RASGRF2	Ras protein-specific guanine nucleotide-releasing factor 2
Q9C0G6	0.961289	DNAH6	dynein, axonemal, heavy chain 6
P05090	0.961287	APOD	apolipoprotein D
Q15418	0.961287	RPS6KA1	ribosomal protein S6 kinase, 90kDa, polypeptide 1
O75676	0.961286	RPS6KA4	ribosomal protein S6 kinase, 90kDa, polypeptide 4
P19174	0.961285	PLCG1	phospholipase C, gamma 1
P12814	0.961284	ACTN1	actinin, alpha 1
P08631	0.961283	HCK	hemopoietic cell kinase
Q9UKN7	0.961283	MYO15A	myosin XVA
O75582	0.961283	RPS6KA5	ribosomal protein S6 kinase, 90kDa, polypeptide 5
P07948	0.961281	LYN	v-yes-1 Yamaguchi sarcoma viral related oncogene homolog
Q16512	0.961281	PKN1	protein kinase N1
Q63HR2	0.961281	TENC1	tensin like C1 domain containing phosphatase (tensin 2)
P15056	0.96128	BRAF	v-raf murine sarcoma viral oncogene homolog B1
P09769	0.961277	FGR	Gardner-Rasheed feline sarcoma viral (v-fgr) oncogene homolog
P06239	0.961277	LCK	lymphocyte-specific protein tyrosine kinase
P43250	0.961274	GRK6	G protein-coupled receptor kinase 6
Q12866	0.961273	MERTK	c-mer proto-oncogene tyrosine kinase
Q15349	0.961269	RPS6KA2	ribosomal protein S6 kinase, 90kDa, polypeptide 2
O14976	0.961263	GAK	cyclin G associated kinase
P51812	0.961263	RPS6KA3	ribosomal protein S6 kinase, 90kDa, polypeptide 3
Q16513	0.961261	PKN2	protein kinase N2
Q9UK32	0.961258	RPS6KA6	ribosomal protein S6 kinase, 90kDa, polypeptide 6
P32298	0.961247	GRK4	G protein-coupled receptor kinase 4
Q8WTQ7	0.961246	GRK7	G protein-coupled receptor kinase 7
P37231	0.961245	PPARG	peroxisome proliferator-activated receptor gamma
Q15835	0.961218	GRK1	G protein-coupled receptor kinase 1
O95835	0.961215	LATS1	LATS, large tumor suppressor, homolog 1 (Drosophila)
P82675	0.9605	MRPS5	mitochondrial ribosomal protein S5

## Sheet: Figure S1
Figure S1. The accuracy of our method when applied to another 10 proteins.
